# Supplementary material
Source: publisher site journal article supplement (https://www.dovepress.com/get_supplementary_file.php?f=309129.docx)
Supplement: Supplementary file 1 [file get_supplementary_file.php]

**An Inhaled PI3Kδ inhibitor improves recovery in acutely exacerbating COPD patients, a randomized trial**

Anthony Cahn, J Nicole Hamblin, Jon Robertson, Malcolm Begg, Emily Jarvis, Robert Wilson, Gordon Dear, Claudia Leemereise, Yi Cui, Maki Mizuma, Mickael Montembault, Cedric Van Holsbeke, Wim Vos, Wilfried De Backer, Jan De Backer, Edith M Hessel

**Supplementary Methods**

**Important protocol amendments**

The protocol was amended in May-2015 to exclude patients with a clinically significant pneumonia and to clarify that historical values (if the assessment was conducted as part of the standard of care) for blood gases, blood culture and sputum culture may also be collected if available. Subjects with clinically significant pneumonia are prone to a more complicated clinical course than simple COPD exacerbation. This would therefore have altered the clinical progress of the patient in the study since the patient’s recovery is determined more by the presence of pneumonia than the concomitant COPD exacerbation. Hence exclusion of patients with a clinically significant pneumonic component made the recruited population less heterogeneous and more representative of uncomplicated COPD exacerbation

**Methods**

**Detailed FRI methodology**

Paired LD-HRCT scans were conducted at two different lung volumes, TLC and FRC, during breath hold. In order to control the lung volume, the patients’ breathing signal was monitored with a handheld spirometer (Spirostik™ by Geratherm® Respiratory), connected with a laptop on which specialized software is running (Blue Cherry by Geratherm® Respiratory).

The patient is asked to breathe in fully and to hold his breath for the duration of the TLC scan. In a second phase, the patient is asked to breathe to slowly exhale until FRC and to hold his breath, after which the FRC scan is taken. Based on these scans, multiple parameters can be extracted using the FRI workflow; the following parameters were analyzed (or derived for the analysis) as part of this dataset and are presented in the results:

- Image based Lobe volumes (iVlobe): By identifying and grouping the voxels that represent the air in the lungs the lung volume can be determined from the scans. During segmentation, identifying the fissure planes on the CT images and using these surfaces as cutting objects can separate lung lobes. This means that not only the total lung volume is determined, but also the volume of each lobe individually.
- Internal lobar airflow distribution (IALD): By segmenting the lobes at FRC and TLC for each patient, the patient-specific airflow distribution can be established by assessing lobar volume expansion.
- Specific airway volume (siVaw): In the CT scans, the airways can be segmented up to the point where no distinction can be made between the intraluminal and alveolar air. This is where the airway diameter is around 1 – 2 mm, typically around the 5th to 10th bifurcation, depending mainly on the disease state of the individual patient. From the resulting model, the central and distal airway volumes (central and distal iVaw) can be assessed at individual airways or in different regions. The distal airway volume is defined as the segmented airway volume starting from the third bifurcation (first generation of segmental airways), that is from the 5 lung lobes without the central region. Visible airway generations can be different between the different study visits. The iVaw measurements can be performed in two ways: 1) measure of all the generations visible at certain study visit day 2) only asses the generations of airways that are visible within the different study visits. The first parameter is called untrimmed iVaw and gives us an idea of the bronchodilation and bronchial recruitment, while the second parameter, called trimmed iVaw, allows us to view the pure bronchodilation. These airway volumes can also be assessed relative to the lobar volume. This parameter is called the specific airway volume (siVaw) (Untrimmed siVaw have been presented in this paper).
- Specific airway resistance (siRaw): The airway resistance (iRaw) is determined using Computational Fluid Dynamics (CFD). During the CFD calculations, the outflow to each lobe is adjusted iteratively for each patient to match the internal flow rate distributions (IALD) obtained from the segmentation of the CT scans hence iRaw accounts for the patient specific internal airflow distribution which might be greatly altered by the lung disease. Hence, the airflow distribution in the CFD calculation reflects the airflow distribution as derived from the expansion of the lung lobes from FRC to TLC. The iRaw is defined as the total pressure drop over an airway, divided by the flow rate through that airway. For iRaw, the airways are trimmed until the same length for the different visits. These airway resistances can also be assessed relative to the lobar volume. This parameter is called the specific airway resistance (siRaw, presented in this paper).
- Air trapping (AT): Air trapping is defined as all the intrapulmonary voxels with Hounsfield Units between -1024 and -850 using the expiratory scans at FRC. This parameter is given as percentage of iVlobe.
- Low attenuation or emphysema score (LAS): Low attenuation score is defined as all the intrapulmonary voxels with Hounsfield Units between -1024 and -950 using the inspiratory scans at TLC. This parameter is given as percentage of iVlobe.
- Blood vessel density (BVD): Blood vessel density can be determined through segmentation and three-dimensional reconstruction of the blood vessels on the TLC scan. The blood vessel density can be considered a surrogate for perfusion. This parameter is given as percentage of iVlobe.
- Specific airway wall thickness (siVaww): The airway wall volume consists of all visible tissue in the CT scan that encompasses the airway wall. The airway wall volume can typically be described to the same generation level as the volume description of the airway lumen, this is where the airway diameter is around 1 - 2 mm. This parameter given relative to the lobar volume, siVaww, was presented in this paper.

**Secondary endpoint data collection**

As soon as the patient was able, FEV1 and peak expiratory flow (PEF) were measured each day prior to treatment, using a handheld device (AM3® device, ERT, Philadelphia, USA). Data were electronically downloaded from the AM3 device at each site visit and transferred to GSK for analysis. Whole body plethysmography (for determination of specific conductance (sGaw) and specific resistance (sRaw)), and diffusion capacity, using the single breath technique, were measured at the clinic within 48 hours of starting treatment for outpatients or prior to discharge for hospitalized patients, and then on Days 28 and 84 of treatment, using the site’s own calibrated equipment. The same equipment was used for an individual patient throughout the study and according to local methodology.

Patient reported outcomes, the COPD Assessment Test (CAT) and the modified Medical Research Council Dyspnea Scale (mMRC), were completed by patients on Days 1, 28 and 84 of treatment. Safety was assessed by vital signs (heart rate and blood pressure), 12-lead electrocardiograph (ECG), and routine laboratory assessments at screening, pre-dose on Day 1, pre-dose on Days 12, 28, 56 and 84 of treatment, and at the follow-up visit. Adverse events were monitored throughout the treatment period and during follow-up.

The number of treatment failures was defined as one or more of the following: 1) recurrent exacerbation defined as an exacerbation event occurring after ≥ 7 days from the end of treatment for the primary exacerbation (index exacerbation), 2) Prolonged treatment with systemic/oral corticosteroids and/or antibiotics for the current exacerbation beyond 14 days or additional treatment with systemic/oral corticosteroids and/or antibiotics given < 7 days from the end of treatment for primary exacerbation, 3) requirement for invasive ventilation. The time to next exacerbation was also assessed, measured from Day 1 of the index exacerbation.

Blood samples for PK sampling were collected on Days 1, 12, 28, 56 and 84 of treatment. Samples were collected into K3 Ethylenediaminetetraacetic acid (EDTA) tubes at pre-dose, 5 min, 3 h and 24 h post-dose on Day 1 (the 24 h post dose timepoint was optional for subjects not hospitalized), and at pre-dose only at all other visits. Samples were centrifuged at 1600g for 15 minutes, the plasma aliquoted off and frozen immediately, and were then shipped to Aptuit, Verona, Italy for analysis. A validated method based on protein precipitation, followed by liquid chromatography tandem mass spectrometry (LC/MS/MS) was used to analyze the samples. The lower and higher limits of quantification for nemiralisib were 20 pg/mL and 10000 pg/mL respectively. The PK parameters of maximum plasma concentration (Cmax, Day 1 only) and trough concentration (Ctau) were derived from the plasma concentration-time data.

**Detailed statistical analyses**

We utilised a subset of FRI data from a now published study (FLUIDDA nv, Belgium) [1], a subset from a study of COPD subjects at onset and 6 weeks after acute COPD exacerbation, an estimate of the between subject standard deviation of 0.145 on the natural logarithmic (loge) scale for siVaw was obtained. With a pre-defined study success criterion of achieving a posterior probability level of 90% that the true ratio between nemiralisib and placebo being greater than 1, and using non-informative priors for analysis purposes, the sample size of 50 subjects per arm completing Day 28, resulted in 77% probability of declaring success, assuming the true treatment improvement of siVaw of nemiralisib over placebo was 6% (ratio of 1.06).

For the secondary untrimmed HRCT endpoints: IALD, LAS, AT and BVD similar multivariate models were fitted to the untrimmed siVaw model. It should be noted that, due to the distribution, the parameter Air Trapping Score was not log transformed prior to analysis and thus the median posterior differences rather than median posterior ratios will be presented.

For the secondary scan trimmed HRCT endpoint: siRaw, a similar Bayesian model was fitted as per the untrimmed data, however an additional covariate for the 3 scan trimming pairs (Screening:Day 12, Screening:Day 28 and Day 12:Day 28) was fitted and as a result baseline was not fitted as a timepoint in the model.

New exacerbation events were derived from the concomitant medications’ dataset similar to the definition of treatment failures:

1. Recurrent exacerbation defined as an exacerbation event occurring after ≥ 7 days from the end of treatment for the primary exacerbation
2. Prolonged treatment
   1. with systemic/oral corticosteroids and/or antibiotics for the current exacerbation beyond 14 days
   2. or additional treatment with systemic/oral corticosteroids and/or antibiotics given < 7 days from the end of treatment for primary exacerbation

This was to ensure that separate exacerbations within the same exacerbation event would be treated as the same exacerbation event. Frequency tables were provided on these exacerbation events.

Investigator reported exacerbation data has also been summarized where we have defined severe as exacerbations requiring hospitalization and moderate as exacerbations not requiring hospitalization.

For the secondary lung function parameter FEV1, the change from baseline was analyzed in a Bayesian repeated measures model. Baseline*Visit and Treatment*Visit class parameters were fitted. The Treatment had two levels: nemiralisib 1 mg and Placebo, and the Visit had two levels: Day 12 and Day 28. No fixed assumption around the structure of the covariance matrix was enforced. The priors for the mean vector for each of the parameters (i.e covariates) each follow a normal distribution with large variance and the prior for the variance-covariance follows an inverse Wishart distribution. Subject 281 was excluded from analysis due to potentially erroneously large FEV1 recorded at baseline. A post hoc subgroup analyses was also conducted splitting patients by the severity of their index exacerbation (hospitalized or not hospitalized), by fitting a three-way interaction term into the model of severity*treatment*visit.

For the secondary lung function parameter sGaw, statistical analysis was conducted on the log change from baseline of sGaw which was calculated as 1/sRaw unspecified. A similar model was fitted to the FEV1 models, including a similar post-hoc subgroup analysis.

For the secondary PRO endpoints CAT and mMRC no statistical analysis was conducted but summary statistics for the change from baseline have been provided.

A post-hoc analysis on the rate of exacerbations was conducted using a generalized linear model with a log link function. This model included a covariate for the treatment group as well as an offset variable (loge(length of time in study)) to reflect the period of time in the study for which exacerbation data had been recorded for inclusion in the model. Three separate models were conducted for severe (defined as hospitalized), moderate (defined as non-hospitalized), or moderate/severe investigator-reported exacerbations. Rate was estimated per 84 days (12 weeks approximately 3 months).

A post-hoc summary of baseline concurrent maintenance therapy was provided, summarizing inhaled COPD related ICS, LAMA or LABA started on or before day 1.

A post hoc summary of oral corticosteroid burden was provided. Nebulized Pulmicort is included in the definition of OCS and a missing stop date for any OCS has been assumed to be the end date of study treatment.

**Details on Randomization and Blinding Procedures**

Subjects were assigned to treatments in accordance with the randomization schedule generated by Clinical Statistics (GSK), prior to the start of the study, using validated internal software; Randall NG. A center-based randomization was used with a block size of 4. Following screening, centers contacted GSK’s interactive voice recognition system (IVRS) where the Randomization and Medication Ordering System (RAMOS NG) would provide the appropriate the randomization number and appropriate container code for the drug substance held at site. The center, Investigator, and subject were blinded throughout the study.

**Interim Analyses**

Three interim analyses (Oct15, n=30; Dec15, n=50; Feb16, n=60) were performed during the conduct of the study for internal decision making and planning purposes. No changes in study conduct, outcome or analyses resulted from these interims.

**Results**

**Table S1: Mean number of occasions of rescue use per day**

| **Weeks** | **Treatment** | **n** | **Mean** | **95% CI** | **SD** | **Median** | **Min.** | **Max.** |
| --- | --- | --- | --- | --- | --- | --- | --- | --- |
| **1-4** | Placebo | 61 | 1.531 | (0.969, 2.093) | 2.194 | 0.536 | 0 | 9.39 |
|  | Nemiralisib 1 mg | 62 | 1.928 | (1.419, 2.438) | 2.007 | 1.544 | 0 | 8.29 |
| **5-8** | Placebo | 56 | 1.672 | (0.998, 2.345) | 2.516 | 0.482 | 0 | 9.93 |
|  | Nemiralisib 1 mg | 59 | 1.669 | (1.135, 2.204) | 2.051 | 1.000 | 0 | 9.11 |
| **9-end of study** | Placebo | 54 | 1.833 | (1.151, 2.515) | 2.499 | 0.821 | 0 | 9.44 |
|  | Nemiralisib 1 mg | 55 | 1.795 | (1.247, 2.342) | 2.025 | 1.154 | 0 | 8.17 |

**Figure S1: Change from baseline in CAT scores and mMRC scores**

**References**

1. van Geffen WH, Hajian B, Vos W, De Backer J, Cahn A, Usmani OS, Van Holsbeke C, Pistolesi M, Kerstjens HA, De Backer W. Functional respiratory imaging: heterogeneity of acute exacerbations of COPD. Int J Chron Obstruct Pulmon Dis 2018;13:1783-1792.

**Appendix 1: Details of Ethics Committees/Institutional Review Boards (IRBs) (for centers where subjects enrolled)**

| **Center** | **Name of Ethics Committee/IRB** |
| --- | --- |
| All centers in Belgium | Ethisch Comité UZA, Wilrijkstraat 10,  Edegem, 2650, Belgium |
| All centers in Denmark | De Videnskabsetiske Komiteer i Region  Hovedstaden, Regionsgården, Koncern  Sekretariatet, Kongens Vænge 2, Hillerød,  DK-3400, Denmark |
| All centers in the Netherlands | Maxima MC, Locatie Veldhoven, De Run  4600, Veldhoven, 5504 DB, Netherlands |
| All centers in Romania | Comisia Nationala de Bioetica a  medicamentelor si a Dispozitivelor Medicale,  Pavilion K, Spitalul Clinic Colentina, Sos.  Stefan cel Mare nr 19-21, Bucuresti,  020125, Romania |
| FGU Scientific Research Institute of  Pulmonology of Roszdrav, Federal  State Budget Institution Pulmonology  Research Institute of Federal Medicobiologic  Agency, Pulmonology Department, korp 4 32/61, 11 Parkovaja Street, Moscow, 105077, Russia | FGU "Scientific Research Institute of  Pulmonology of ROSZDRAV", 11 Parkovaja  Street, 32/61, Moscow, 105077, Russia |
| Federal State Budgetary Institution  Research Institute for Complex Issues  of Cardiovascular Diseases, Siberian  Branch of the Russian Academy of  Medical Sciences(RAMS), 6 Sosnoviy  Boulevard, Kemerovo, 650002,  Russia | Russian Academy of Medical Sciences  Scientific Research Institute of Complex  Problems of Cardiovascular Diseases, 6  Sosnoviy Boulevard, Kemerovo, 650002,  Russia |
| Clinical Hospital #122, 4 Kultury  Prospekt, St Petersburg, 194291,  Russia | Clinical Hospital #122, 4 Kultury prosp, St.  Petersburg, 194291, Russia |
| Medical Association Novaya Bolnitsa,  29 Zavodskaya street, Ekaterinburg,  620109, Russia | Uralskaya State Medical Academy Roszdrav,  3a Repina Street, Ekateinburg, 620219,  Russia |
| Clinical Hospital for Emergency Care  n.a. N.V. Solovyov, 11 Zagorodny sad  street, Yaroslavl, 150003, Russia | Municipal Health Care Institution Clinical  Hospital for Emergency Medical Care, 11  Zagorodny Sad, Yaroslavl, 150003, Russia |
| Regional Clinical Hospital, 41  Sudogodskoe shosse, Vladimir,  600023, Russia | Regional Clinical Hospital, 41, Sudogodskoe  shosse, Vladimir, 600023, Russia |
